# Supplementary material
Source: publisher figshare collection journal article supplement (https://rs.figshare.com/ndownloader/files/17484716)
Supplement: Supplementary file [file 17484716]

# Supplementary File D

## A - Marine mammals

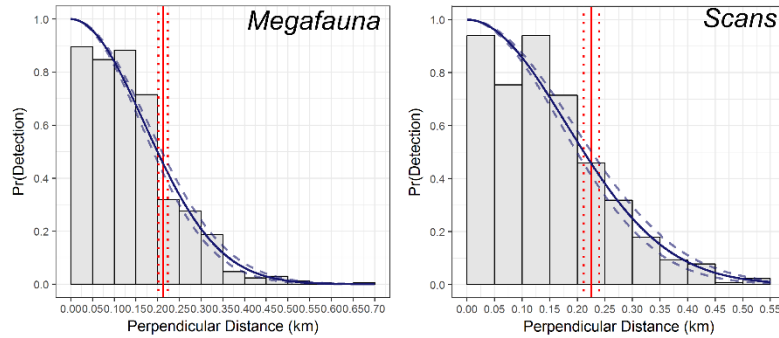

## B - Harbour porpoises

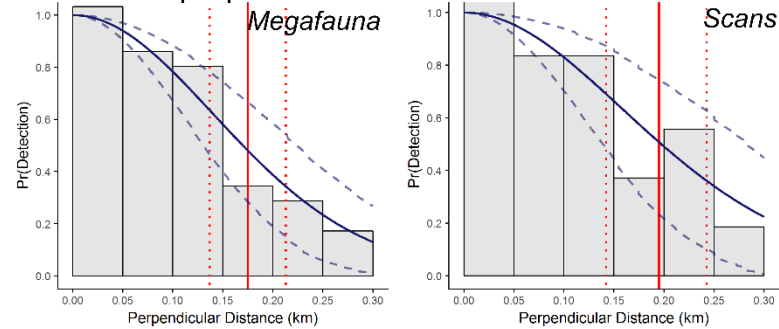

## C - Common/striped dolphins

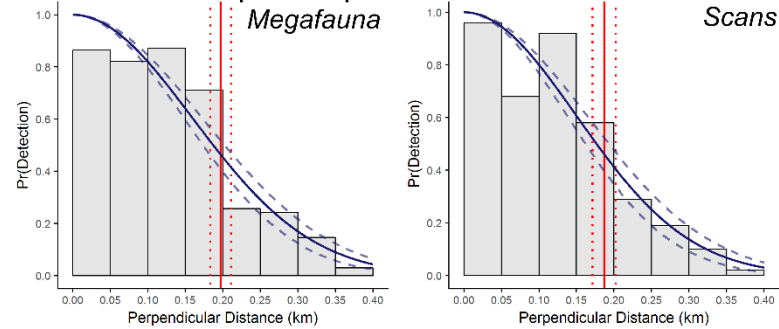

## D - Bottlenose dolphins

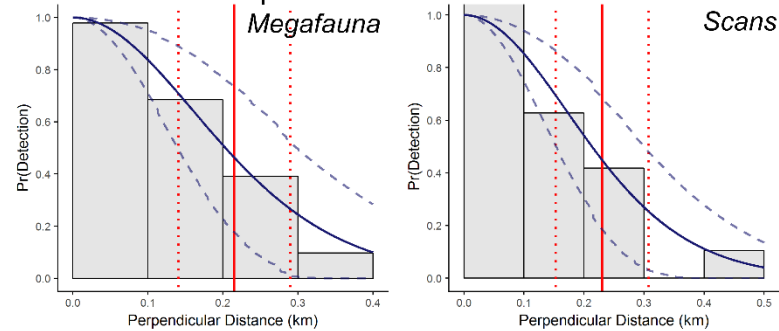

Figure 2. Detection functions fitted through distance sampling methodology for Megafauna (left) and Scans (right) platforms, for the four studied groups of cetaceans (A – marine mammals considered altogether; B – harbour porpoises; C – common/striped dolphins; D – bottlenose dolphins).

Table 1. CDS results by platform for harbour porpoise (A), common/stripped dolphins (B) and bottlenose dolphin (C). The CV of encounter rates, group size, abundance and density estimates are provided in parenthesis. CDS was done over sightings made in good observation conditions (Beaufort sea state < 4 and moderate to excellent subjective conditions) for harbour porpoises and common/stripped dolphins; all sightings were used for bottlenose dolphins. Half-normal key was used for the detection functions of the three groups.

| Platform                   | Sector          | Truncation distance (km) | N obs | N ind | Estimated encounter rate (N(ind)/km) | Estimated pod size (individuals) | Abundance (individuals) | Density (ind/km) | ESW (km)              |
|----------------------------|-----------------|--------------------------|-------|-------|--------------------------------------|----------------------------------|-------------------------|------------------|-----------------------|
| A - Harbour porpoises      |                 |                          |       |       |                                      |                                  |                         |                  |                       |
| Megafauna                  | Bay of Biscay   | 0.28                     | 17    | 42    | 0.006 (0.343)                        | 2.471 (0.218)                    | 2080 (0.360)            | 0.018 (0.360)    | 0.175 [0.137 ; 0.213] |
|                            | English Channel |                          | 44    | 84    | 0.044 (0.247)                        | 1.909 (0.151)                    | 10252 (0.269)           | 0.126 (0.269)    |                       |
|                            | Total           |                          | 61    | 126   | 0.014 (0.203)                        | 1.985 (0.130)                    | 12332 (0.240)           | 0.062 (0.240)    |                       |
| Scans                      | Bay of Biscay   | 0.29                     | 10    | 24    | 0.004 (0.495)                        | 2.400 (0.356)                    | 1231 (0.513)            | 0.01 (0.513)     | 0.192 [0.141 ; 0.240] |
|                            | English Channel |                          | 33    | 66    | 0.038 (0.275)                        | 2 (0.158)                        | 8015 (0.307)            | 0.099 (0.307)    |                       |
|                            | Total           |                          | 43    | 90    | 0.011 (0.242)                        | 2.045 (0.144)                    | 9247 (0.282)            | 0.046 (0.282)    |                       |
| B - Small-sized delphinids |                 |                          |       |       |                                      |                                  |                         |                  |                       |
| Megafauna                  | Bay of Biscay   | 0.4                      | 537   | 3096  | 0.447 (0.125)                        | 5.765 (0.071)                    | 134706 (0.130)          | 1.137 (0.130)    | 0.197 [0.183 ; 0.211] |
|                            | English Channel |                          | 1     | 15    | 0.008 (0.998)                        | 15 (0)                           | 1608 (0.999)            | 0.020 (0.999)    |                       |
|                            | Total           |                          | 538   | 3111  | 0.352 (0.125)                        | 5.808 (0.070)                    | 136314 (0.129)          | 0.682 (0.129)    |                       |
| Scans                      | Bay of Biscay   | 0.4                      | 372   | 2834  | 0.472 (0.155)                        | 7.618 (0.117)                    | 149848 (0.160)          | 1.265 (0.160)    | 0.187 [0.171 ; 0.202] |
|                            | English Channel |                          | 2     | 24    | 0.014 (0.848)                        | 12 (0.473)                       | 3002 (0.849)            | 0.037 (0.849)    |                       |
|                            | Total           |                          | 374   | 2858  | 0.369 (0.155)                        | 7.673 (0.115)                    | 152850 (0.158)          | 0.765 (0.158)    |                       |
| C - Bottlenose dolphins    |                 |                          |       |       |                                      |                                  |                         |                  |                       |
| Megafauna                  | Bay of Biscay   | 0.34                     | 22    | 171   | 0.021 (0.337)                        | 7.773 (0.194)                    | 5988 (0.378)            | 0.051 (0.378)    | 0.215 [0.141 ; 0.290] |
|                            | English Channel |                          | 0     | 0     | 0                                    | 0                                | 0                       | 0                |                       |
|                            | Total           |                          | 22    | 171   | 0.016 (0.338)                        | 7.773 (0.194)                    | 5988 (0.378)            | 0.030 (0.378)    |                       |
| Scans                      | Bay of Biscay   | 0.411                    | 22    | 158   | 0.020 (0.302)                        | 7.182 (0.175)                    | 5156 (0.343)            | 0.044 (0.343)    | 0.230 [0.153 ; 0.308] |
|                            | English Channel |                          | 0     | 0     | 0                                    | 0                                | 0                       | 0                |                       |
|                            | Total           |                          | 22    | 158   | 0.015 (0.302)                        | 7.182 (0.175)                    | 5156 (0.343)            | 0.026 (0.343)    |                       |

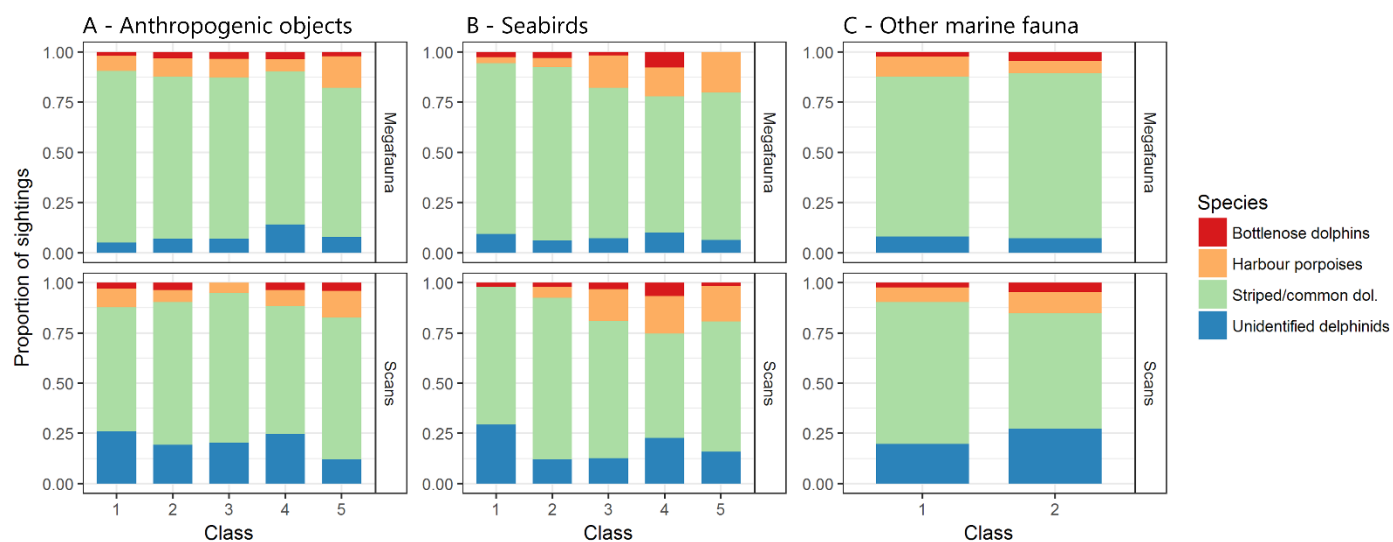

Figure 3. Cetacean species composition for each post-stratified class of anthropogenic objects (A), seabirds (B) and other marine fauna (C), for Megafauna (above) and Scans (below) platforms.

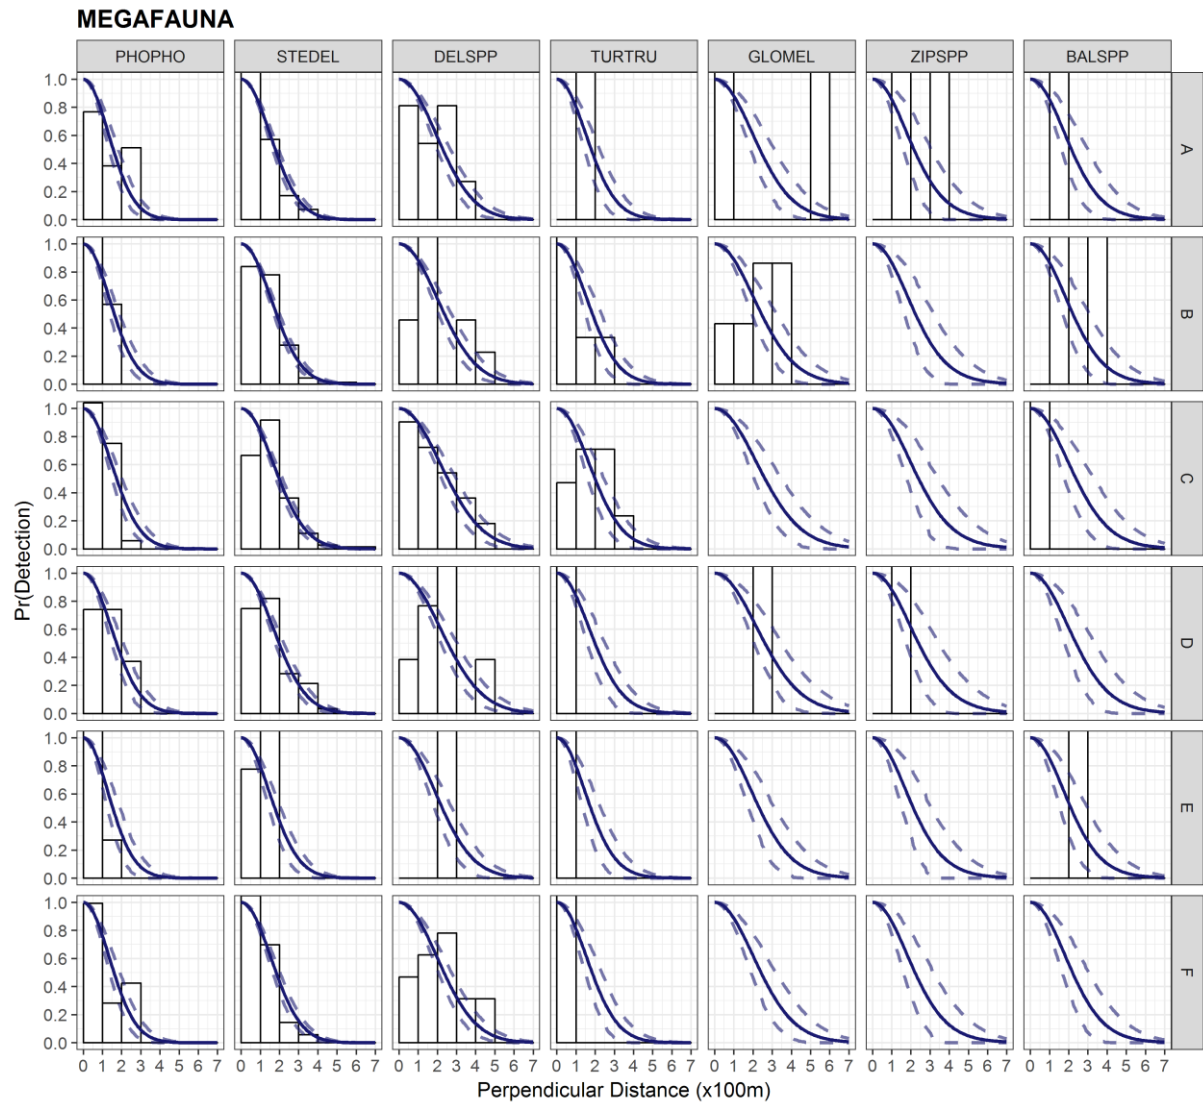

Figure 4. Distance histograms (in white), averaged detection functions (in blue) and associated uncertainty (in dashed blue) for each considered group of species and by observer (A-F), for the Megafauna platform.

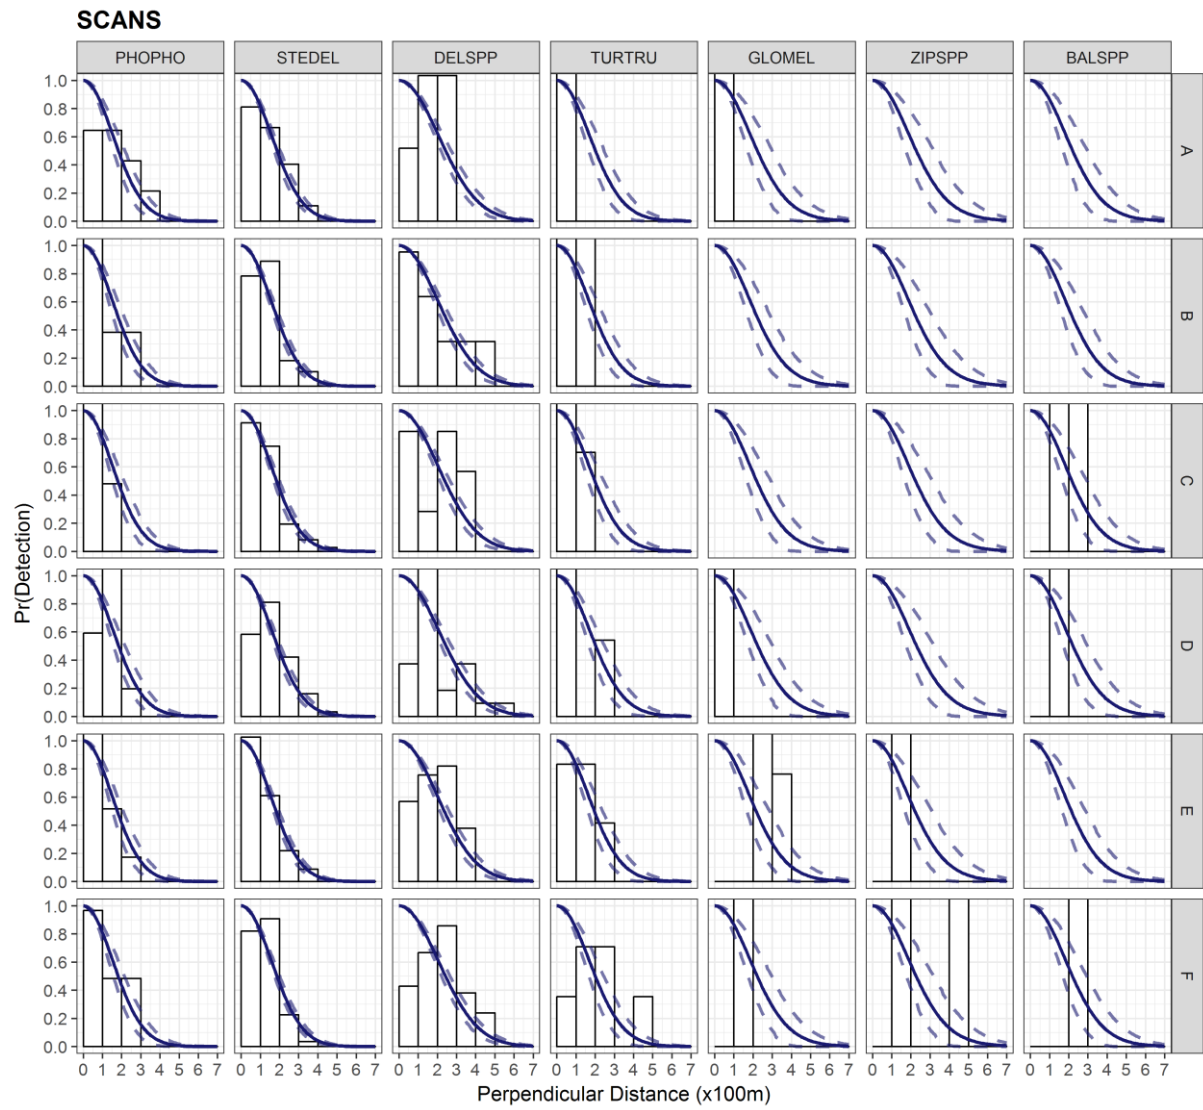

Figure 4. Distance histograms (in white), averaged detection functions (in blue) and associated uncertainty (in dashed blue) for each considered group of species and by observer (A-F), for the Megafauna platform
